# Supplementary material
Source: PubMed Central journal article supplement (PMC4323935)
Supplement: NIHMS653951-supplement-ESI.pdf [file NIHMS653951-supplement-ESI.pdf]

### Supplementary Information for

Qu, Y., Kipping, R.G. and Farrell, N.P.: Solution Studies on DNA Interactions of Substitution-inert Platinum Complexes mediated *via* The Phosphate Clamp. *J. Chem. Soc. Dalton Trans.* DOI: 10.1039/C4DT03237C

**Table S1** <sup>1</sup>H NMR chemical shift assignments for hexamer d(CGTACG)<sub>2</sub> (6mer) in the absence and presence of TriplatinNC at pH7 and pH6

#### Chemical shifts for 6mer at pH7

|    | H6/8  | H2/H5/CH3 | H1'   | H2''  | H2'   | H3'   | H4'   |
|----|-------|-----------|-------|-------|-------|-------|-------|
| C1 | 7.513 | 5.774     | 5.625 | 2.289 | 1.906 | 4.568 | n.d.  |
| G2 | 7.861 | N/A       | 5.837 | 2.639 | 2.558 | 4.841 | 4.226 |
| T3 | 7.162 | 1.405     | 5.527 | 2.293 | 1.989 | 4.746 | n.d.  |
| A4 | 8.189 | n.d.      | 6.098 | 2.721 | 2.589 | 4.894 | 4.293 |
| C5 | 7.155 | 5.254     | 5.499 | 2.142 | 1.723 | 4.644 | n.d.  |
| G6 | 7.755 | N/A       | 5.987 | 2.444 | 2.215 | 4.514 | n.d.  |

#### Chemical shifts for 6mer with TriplatinNC at pH7

|    | H6/8  | H2/H5/CH3 | H1'   | H2''  | H2'   | H3'   | H4'   |
|----|-------|-----------|-------|-------|-------|-------|-------|
| C1 | 7.508 | 5.761     | 5.617 | 2.281 | 1.897 | 4.557 | n.d.  |
| G2 | 7.861 | N/A       | 5.837 | 2.651 | 2.556 | 4.839 | 4.226 |
| T3 | 7.164 | 1.406     | 5.519 | 2.284 | 1.986 | 4.745 | n.d.  |
| A4 | 8.194 | n.d.      | 6.096 | 2.721 | 2.597 | 4.898 | 4.296 |
| C5 | 7.162 | 5.26      | 5.505 | 2.141 | 1.726 | 4.651 | n.d.  |
| G6 | 7.755 | N/A       | 5.984 | 2.445 | 2.219 | 4.518 | n.d.  |

#### Chemical shifts for 6mer at pH6

|    | H6/8  | H2/H5/CH3 | H1'   | H2''  | H2'   | H3'   | H4'   |
|----|-------|-----------|-------|-------|-------|-------|-------|
| C1 | 7.494 | 5.737     | 5.6   | 2.266 | 1.874 | 4.544 | n.d.  |
| G2 | 7.852 | N/A       | 5.83  | 2.641 | 2.548 | 4.829 | 4.22  |
| T3 | 7.159 | 1.392     | 5.509 | 2.279 | 1.974 | 4.734 | n.d.  |
| A4 | 8.178 | n.d.      | 6.09  | 2.712 | 2.583 | 4.886 | 4.281 |
| C5 | 7.15  | 5.241     | 5.495 | 2.13  | 1.713 | 4.629 | n.d.  |
| G6 | 7.74  | N/A       | 5.969 | 2.442 | 2.209 | 4.505 | n.d.  |

#### Chemical shifts for 6mer with TriplatinNC at pH6

|    | H6/8  | H2/H5/CH3 | H1'   | H2''  | H2'   | H3'   | H4'   |
|----|-------|-----------|-------|-------|-------|-------|-------|
| C1 | 7.511 | 5.766     | 5.622 | 2.285 | 1.9   | 4.56  |       |
| G2 | 7.865 | N/A       | 5.84  | 2.657 | 2.561 | 4.844 | 4.232 |
| T3 | 7.167 | 1.41      | 5.524 | 2.287 | 1.987 | 4.745 |       |
| A4 | 8.196 | n.d.      | 6.099 | 2.723 | 2.599 | 4.9   | 4.299 |
| C5 | 7.165 | 5.263     | 5.507 | 2.146 | 1.731 | 4.651 |       |
| G6 | 7.757 | N/A       | 5.986 | 2.451 | 2.224 | 4.521 |       |

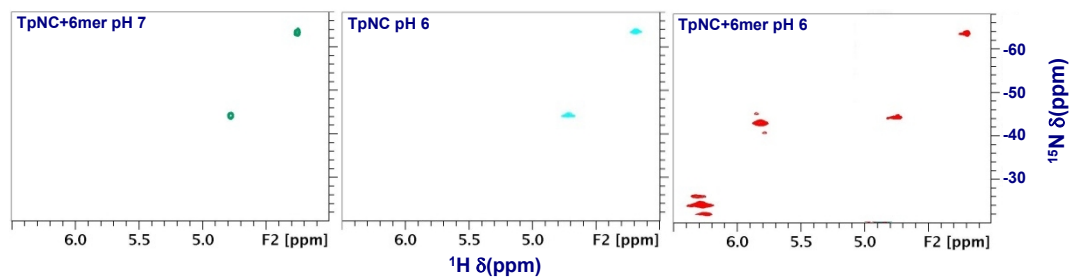

**Fig. S1** 2D  $\{^1\text{H}, ^{15}\text{N}\}$  HSQC NMR spectrum of  $^{15}\text{N}$ -labeled TpNC (left) and with duplex hexamer at pH 7 (mid). And 24 hours after changing the pH to 6 (right), the NMR spectra showed the additional peaks at  $\delta^1\text{H}$  (5.82) /  $^{15}\text{N}$  (-43.0) and  $\delta^1\text{H}$  (6.28) /  $^{15}\text{N}$  (-24.0) ppm.
